# Supplementary material for: Potential application of rLc36 protein for diagnosis of canine visceral leishmaniasis
Source: PubMed Central journal article supplement (PMC5804312; doi:10.1590/0074-02760170171), 2018-03
Supplement: 0074-0276-mioc-113-03-0197-Suppl02.pdf [file 0074-0276-mioc-113-03-0197-Suppl02.pdf]

SEQUENCES ANALYSIS

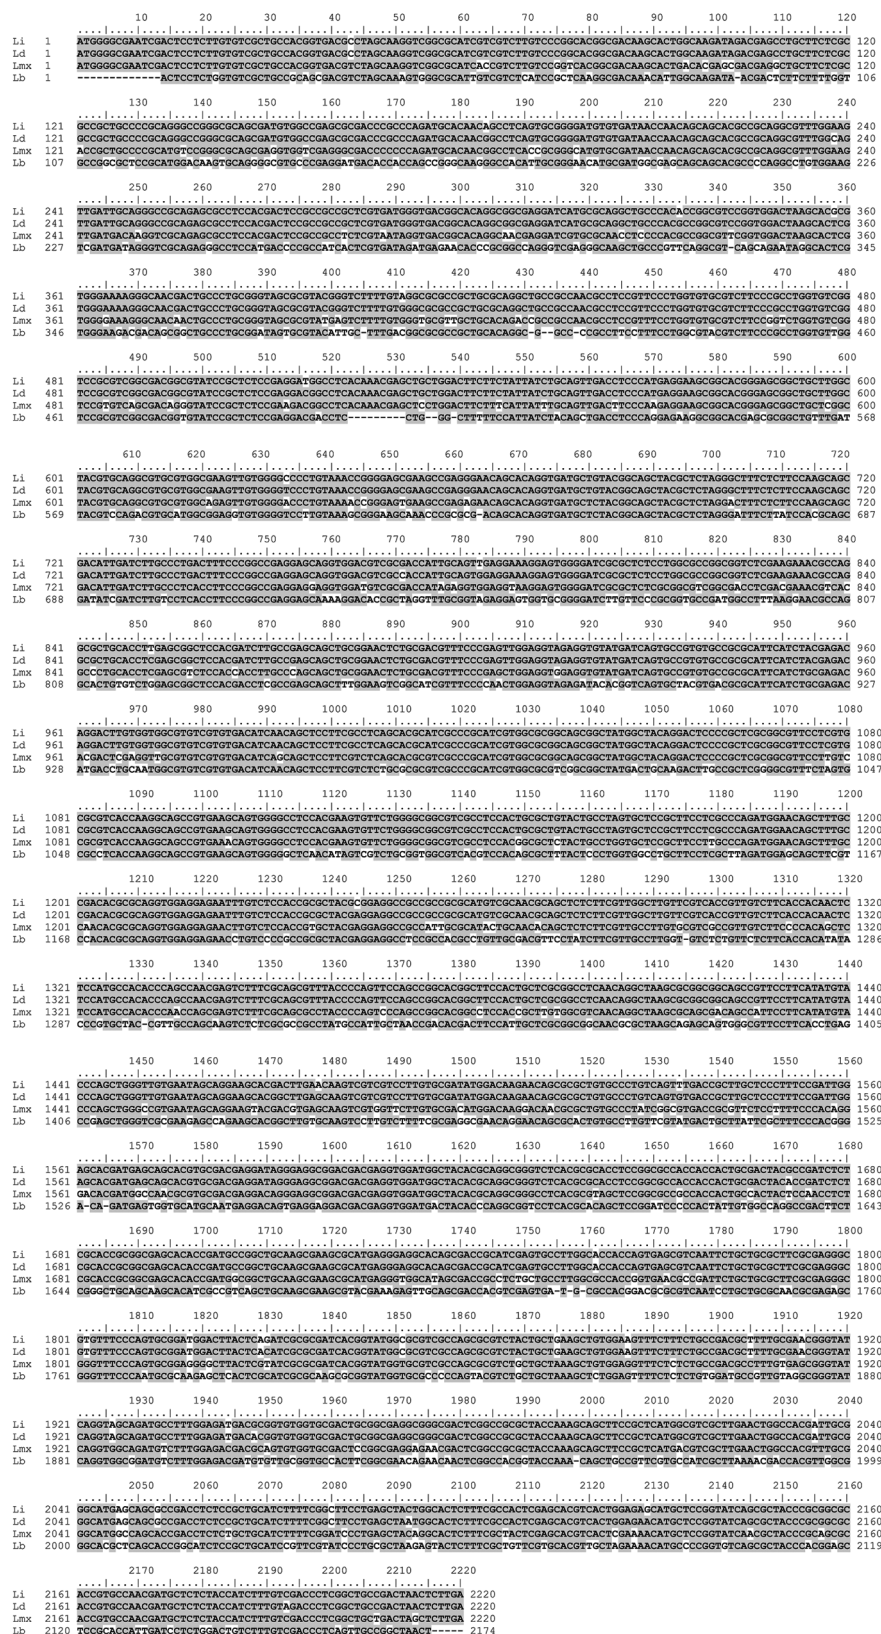

Fig. 1A: multiple nucleotide sequence alignments of Li: *Leishmania infantum* LINJ\_36\_4190 (GenBank ID: FR796468.1), Ld: *L. donovani* LDBPK\_364190 (GenBank ID: FR799623.2), Lmx: *L. mexicana* LMXM\_36\_3991 (GenBank ID: FR799573.1), and Lb: *L. braziliensis* LBRM\_35\_4231 (GenBank ID: FR799010.1). Matches are highlighted in grey and the discrepancies are white, traced lines mean the gaps. Source: BLASTN 2.6.1+ (<https://blast.ncbi.nlm.nih.gov/Blast.cgi>).

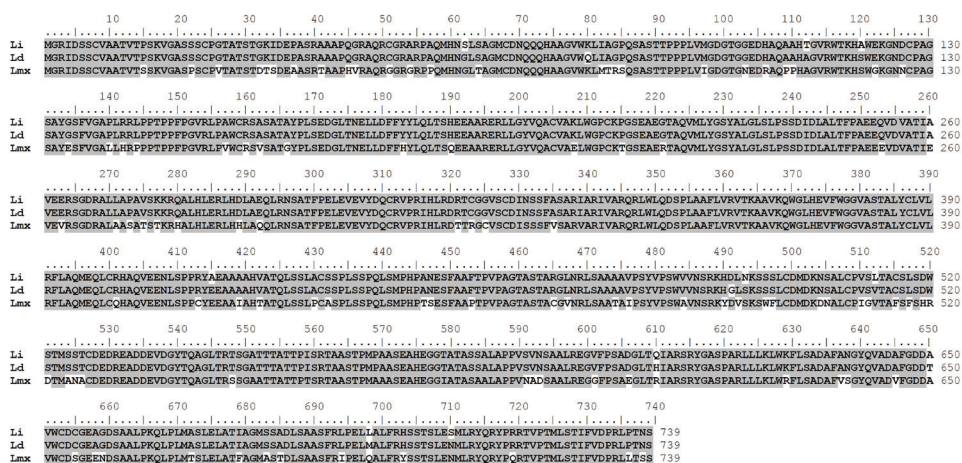

Fig. 1B: multiple peptide sequence alignments of Li: *Leishmania infantum* hypothetical protein LINJ\_36\_4190 (GenBank ID: XP\_001469615.1), Ld: *L. donovani* hypothetical protein LDBPK\_364190 (GenBank ID: XP\_003865533.1) and Lmx: *L. mexicana* LMXM\_36\_3991 (GenBank ID: XP\_003874756.1). Matches are highlighted in grey and the discrepancies are white, traced lines mean the gaps. Source: BLASTX 2.6.1+ (<https://blast.ncbi.nlm.nih.gov/Blast.cgi>).

### EPIOTOPE PREDICTION RESULTS

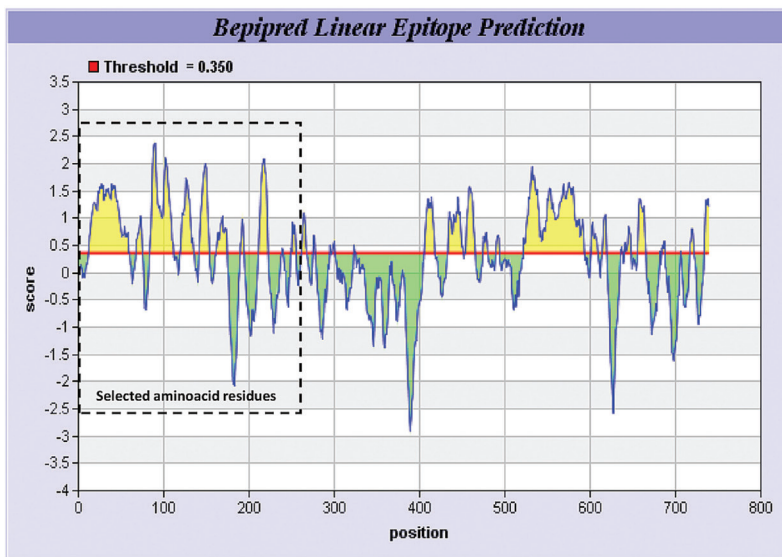

Fig. 2: epitopes prediction to B-cell using data base IEDB Analysis Resource. Predict epitope regions are plotted up the threshold of 0.350 (red line) and are highlighted in yellow. Abscissa refers to amino acids positions. Protein encoding by Lc36 gene has 733 amino acids. Dashed line corresponds to the fragment selected for the immunoassays of the Lc36 protein, corresponding to the region between 1-255 amino acid residues. Source: IEDB Analysis Resource, URL <http://tools.immuneepitope.org/bcell/>.

TABLE I  
 Predicted peptides. Epitopes prediction to B-cell using data base IEDB Analysis Resource

| No. | Start | End | Peptide                                                                     | Length |
|-----|-------|-----|-----------------------------------------------------------------------------|--------|
| 1   | 12    | 59  | TVTPSKV GASSCPGTATSTGKIDEPASRAAAPQGRAQRCGRARPAQM                            | 48     |
| 2   | 68    | 75  | CDNQQQHA                                                                    | 8      |
| 3   | 84    | 111 | GPQSASTT PPLVMGDGTGGEDHAQAAH                                                | 28     |
| 4   | 120   | 135 | AWEKGNDCPAGSAYGS                                                            | 16     |
| 5   | 142   | 153 | RRLPPTPPFPGV                                                                | 12     |
| 6   | 162   | 174 | ASATAYPLSEDGL                                                               | 13     |
| 7   | 190   | 194 | HEEAA                                                                       | 5      |
| 8   | 212   | 222 | PCKPGSEAEGT                                                                 | 11     |
| 9   | 239   | 240 | SS                                                                          | 2      |
| 10  | 249   | 255 | PAEEQVD                                                                     | 7      |
| 11  | 262   | 267 | EERSGD                                                                      | 6      |
| 12  | 275   | 277 | VSK                                                                         | 3      |
| 13  | 295   | 296 | RN                                                                          | 2      |
| 14  | 298   | 300 | ATF                                                                         | 3      |
| 15  | 323   | 325 | CGG                                                                         | 3      |
| 16  | 406   | 417 | EENLSPPRYAEA                                                                | 12     |
| 17  | 433   | 451 | SPLSSPQLSMPHPANESFA                                                         | 19     |
| 18  | 453   | 465 | FTPVPAGTASTAR                                                               | 13     |
| 19  | 475   | 479 | AVPSY                                                                       | 5      |
| 20  | 490   | 493 | HDLN                                                                        | 4      |
| 21  | 522   | 593 | TMSSTCEDREADDEVDGYTQAGLTRTSGATTTAT<br>TPISRTAASTPMPAASEAHEGGTATASSALAPPVSVN | 72     |
| 22  | 601   | 608 | VFPSADGL                                                                    | 8      |
| 23  | 615   | 619 | RYGAS                                                                       | 5      |
| 24  | 636   | 638 | FAN                                                                         | 3      |
| 25  | 641   | 648 | QVADAFGD                                                                    | 8      |
| 26  | 656   | 665 | GEAGDSAALP                                                                  | 10     |
| 27  | 682   | 682 | M                                                                           | 1      |
| 28  | 684   | 687 | SADL                                                                        | 4      |
| 29  | 706   | 706 | T                                                                           | 1      |
| 30  | 717   | 721 | YPRRT                                                                       | 5      |

Source: IEDB Analysis Resource, URL <http://tools.immuneepitope.org/bcell/>. Larsen et al. (2006).

```

Calculating prediction for the following proteins
with reference library 08:
>pLc36
... Done.
*** List of predicted non-TM-protein codes ***
>pLc36
*** List of predicted TM-protein codes ***
none
=== Result of the prediction ===
>pLc36
# TMH: 1 Q: 0.58 !!! Warning! Non-TM protein!
@ 385 2.698 core: 383 .. 388 7.791e-02
<----- end of list ----->

```

Fig. 3: prediction of transmembrane domain of the pLc36 protein. Source: author, using DAS-TMfilter. Available from: <http://mendel.imp.ac.at/sat/DAS/DAS.html>.

### CLONING AND EXPRESSION IN *ESCHERICHIA COLI*

DNA of *Leishmania infantum* was extracted from a culture of promastigotes by the Pure Link® Kit DNA extraction (Life Technologies). Amplification of the parasite *Lc36* gene was performed using primers *Lc36* Forward (5'-AAACCATGGGGCGAATCGACTCCTCTTGTG-3') and *Lc36* Reverse (5'-TTTAAGCTTGCCACCTGCTCCTCGGCCG-3') containing *NcoI* and *HindIII* restriction enzyme site sequences, respectively. For amplification, 2.5 U of the High Fidelity *Pfu* DNA Polymerase (Thermo Scientific™). The reaction consisted of an initial denaturation step at 95°C for 2 min followed by 30 cycles of denaturation at 95°C for 1 min, annealing at 60°C for 1 min, and extension at 72°C for 1 min, followed by a final extension at 72°C for 5 min. The polymerase chain reaction (PCR) product was purified using the purification kit GFX™ (GE Healthcare) and the concentration of the DNA was measured using the NanoDrop Lite Spectrophotometer (Thermo Scientific). The amplified fragment was ligated into the pGEM-T easy vector (Promega). After *Escherichia coli* DH5 $\alpha$  transformation, the selected transformants were confirmed by DNA restriction analysis. The insert of the plasmid DNA was then liberated with *NcoI* and *HindIII* and ligated using these same sites into the pET28a expression vector (Novagen). In order to check if the DNA fragment was cloned in the correct frame, the recombinant plasmid named pET28a\_*Lc36* was subsequently sequenced by Macrogen Inc. prior to transformation of *E. coli* BL21 (DE3) cells.

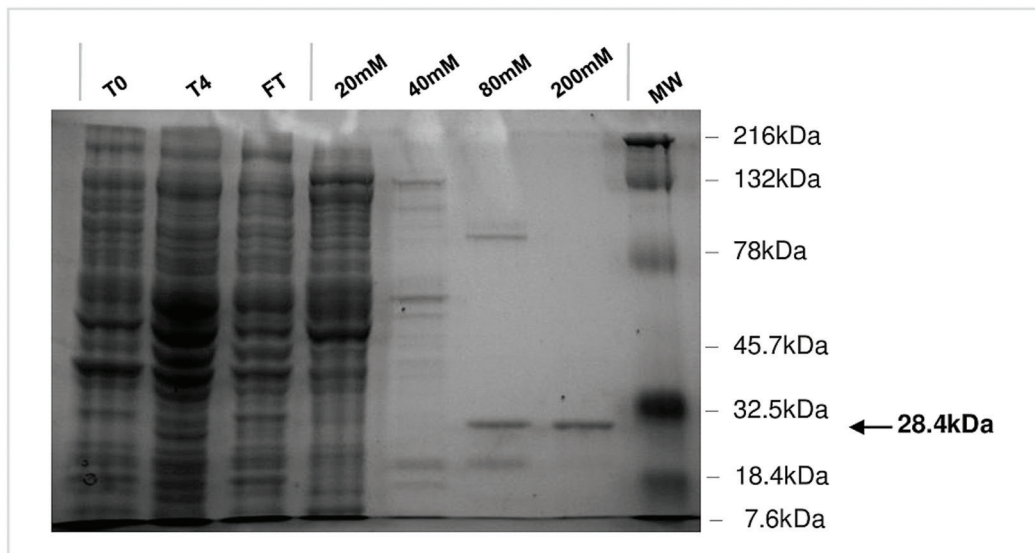

Fig. 4: the rLc36 expression in *Escherichia coli* and purification are confirmed by SDS-PAGE and western blot analysis. A 12% polyacrylamide gel was used and proteins stained with Coomassie blue. Lanes contain proteins from a cell extract of *E. coli* BL21(DE3) pET28aLc<sub>36</sub>. T0: total lysate before induction; T4: total lysate 4 h after induction; FT: total flow through in affinity chromatography; followed by washings of the nickel column with imidazole solutions of 20 mM, 40 mM, 80 mM and 200 mM. MW: Protein molecular weight (Kaleidoscope Prestained Standards - Bio-Rad). The arrow indicates the molecular weight of the recombinant protein rLc36. Source: authors.



## REAL-TIME QUANTITATIVE PCR (RT-QPCR) RESULTS

Equation 1

Plasmid DNA template size equation:

$$(1) n = (c \times [t \times 660]) \times (6.022 \times 10^{23})$$

Where, n = cDNA copy numbers/ $\mu$ L, c = plasmid concentration in g/ $\mu$ L, t = plasmid size (vector+insert) in base pairs, average molecular weight double-stranded DNA molecule = 660 g/mol, Avogadro constant =  $6.022 \times 10^{23}$  molecules/mol (Applied Biosystems tutorials, [http://www6.appliedbiosystems.com/support/tutorials/pdf/quant\\_pcr.pdf](http://www6.appliedbiosystems.com/support/tutorials/pdf/quant_pcr.pdf)).

TABLE II

Real-time quantitative polymerase chain reaction (RT-qPCR) absolute standard curve padronisation using recombinant plasmid pET28a+\_Lc36 and cDNA from *Leishmania infantum* promastigotes and intercellular amastigotes

| Assay                  | pDNA/cDNA       | Amount (ng) | Average $C_T$    | Copy number / $\mu$ L | Copy number / reaction (10 $\mu$ L) | Curve parameters                                                                   |
|------------------------|-----------------|-------------|------------------|-----------------------|-------------------------------------|------------------------------------------------------------------------------------|
| Standard Curve<br>1:10 | 1_pDNA          | 88,7        | 4,44 $\pm$ 0,05  | 1066860405            | 1066860407                          | Slope: -3,34<br>Efficiency: 99,23%<br>$R^2$ : 0,98<br>Threshold: 0,324<br>Tm: 83°C |
|                        | 2_pDNA          | 8,87        | 5,31 $\pm$ 0,05  | 106686040             | 1066860405                          |                                                                                    |
|                        | 3_pDNA          | 0,887       | 8,90 $\pm$ 0,07  | 10668604              | 106686040,5                         |                                                                                    |
|                        | 4_pDNA          | 0,0887      | 12,79 $\pm$ 0,08 | 1066860,4             | 10668604,05                         |                                                                                    |
|                        | 5_pDNA          | 0,00887     | 16,65 $\pm$ 0,18 | 106686,04             | 1066860,405                         |                                                                                    |
|                        | 6_pDNA          | 0,000887    | 20,28 $\pm$ 0,22 | 10668,604             | 106686,0405                         |                                                                                    |
| Samples                | Am_50_18h       | 50          | 36,03 $\pm$ 0,84 | 0,14601325            | 1,4601325                           |                                                                                    |
|                        | Am_50_48h       | 50          | 32,19 $\pm$ 0,60 | 2,051866929           | 20,51866929                         |                                                                                    |
|                        | Am_50_72h       | 50          | Undetermined     | -                     | -                                   |                                                                                    |
|                        | MØuninfected    | 50          | Undetermined     | -                     | -                                   |                                                                                    |
|                        | Pro_50_FinalLog | 50          | Undetermined     | -                     | -                                   |                                                                                    |

Am: amastigote cDNA (18 h, 48 h and 72 h post-infection); MØ: uninfected macrophage cDNA; Pro: logarithmic phase promastigote cDNA;  $C_T$ : cycle threshold; Tm: melting temperature. Plots illustrated at Figs 4 and 5. Source: author, adapted by Origin® and Excel® using file from software StepOne™ v2.3.

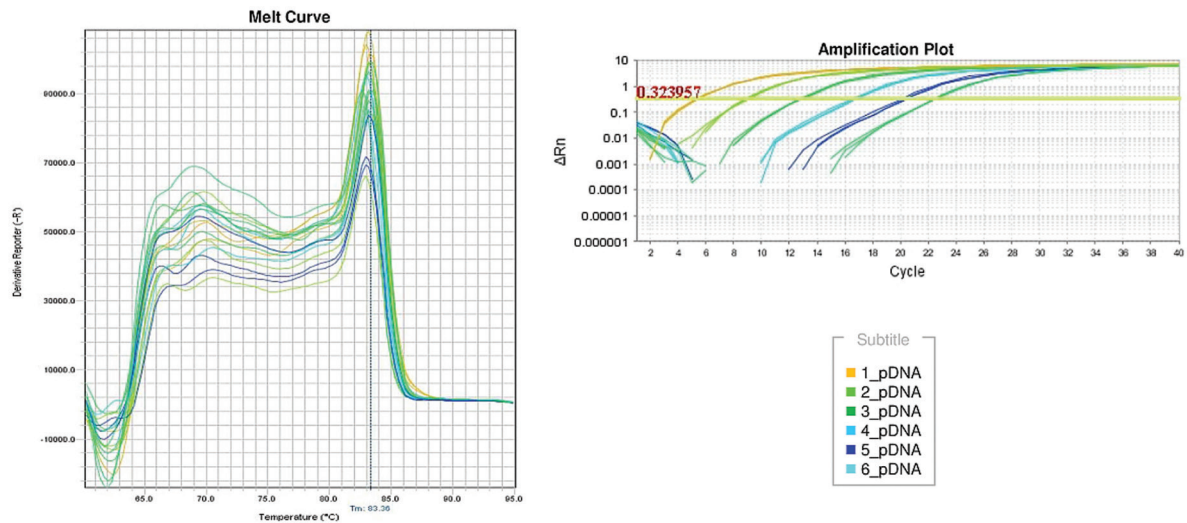

Fig. 5: amplification and melt plots of standard curve of the Lc36 expression real-time quantitative polymerase chain reaction (RT-qPCR) assay by absolute quantification. Plots data are described in Table II. Source: author, software StepOne™ v2.3.

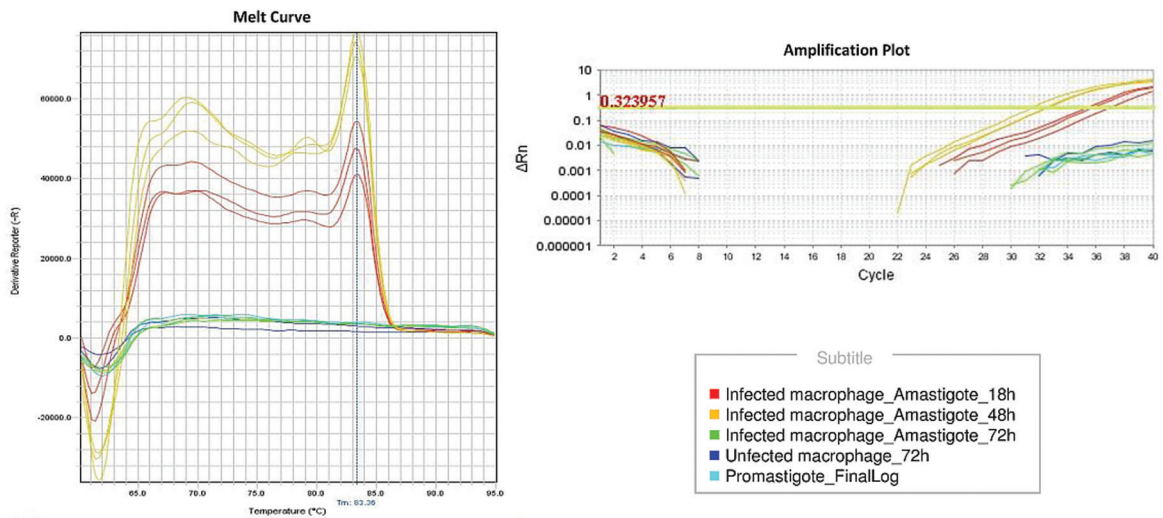

Fig. 6: amplification and melt plots of Samples of the Lc36 expression real-time quantitative polymerase chain reaction (RT-qPCR) assay by absolute quantification. Plots data are described in Table II. Source: author, software StepOne™ v2.

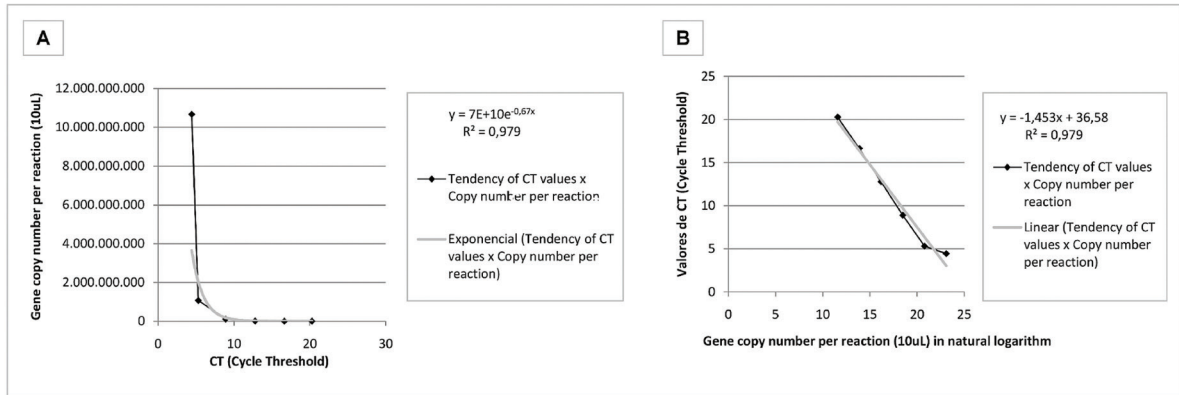

Fig. 7: set equations for Lc36 gene expression evaluation. (A) Plot of exponential tendency curve of copy number per reaction related to standard absolute curve  $C_T$  values. (B) Plot of natural logarithmic of copy number per reaction related to standard absolute curve  $C_T$  values. Source: author, adapted by Origin® and Excel® using file from software StepOne™ v2.3.

## IMMUNOASSAYS RESULTS

Equations 2, 3 and 4. Cut-off and accuracy determination:

According to Frey et al. (1998), for *cut-off* calculation, we used the sum of average plus standard deviation of 20 known-negative sera absorbance (Supplementary data, Tables III-IV) that showed the lowest values during our enzyme-linked immunosorbent assay (ELISA) assays using rLc36 selected fragment protein expressed. That sum was multiplied by an appropriate constant for *cut off* determination, which were 1.772 for 95% of confidence and 2.602 for 99% of confidence. As sera were previously confirmed for canine visceral leishmaniasis (CVL), we separate them into true positives (TP) and true negatives (TN), as well as false positives (FP) and false negatives (FN) groups. Sera absolute amount of each group was used for sensibility (s) and specificity (e) calculation according to equations (2)  $s = TP/(TP + FN)$  and (3)  $e = TN/(TN + FP)$ , respectively. Accuracy (Ac) was calculated using equation (4)  $Ac = e + p$ . (s-e), in which p is prevalence and was determined by the relation between amount of dog sera infected and total of amount dog sera ( $p = Do/n$ ), according to Kawamura (2002).

TABLE III  
Absorbance average of sera tested against recombinant protein Lc36 after 60 min of reaction. Sera dilution of 1:200

| Sera identification | Absorbance (405 nm) | Sera identification | Absorbance (405 nm) | Sera identification | Absorbance (405 nm) | Sera identification | Absorbance (405 nm) |
|---------------------|---------------------|---------------------|---------------------|---------------------|---------------------|---------------------|---------------------|
| n1                  | 0.2565              | n17                 | 0.1725              | n38                 | <b>0.0365</b>       | n56                 | <b>0.1335</b>       |
| n2                  | 0.1425              | n18                 | 0.1445              | n40                 | <b>0.1075</b>       | n57                 | 0.1945              |
| n4                  | 0.2265              | n19                 | 0.1415              | n41                 | <b>0.0675</b>       | n58                 | <b>0.0525</b>       |
| n5                  | 0.2005              | n21                 | 0.1345              | n42                 | 0.1485              | n59                 | <b>0.0255</b>       |
| n6                  | 0.1575              | n23                 | <b>0.1155</b>       | n43                 | <b>0.0485</b>       | n60                 | 0.1385              |
| n7                  | 0.2035              | n24                 | <b>0.0625</b>       | n44                 | 0.2465              | p2                  | 0.413               |
| n8                  | <b>0.0865</b>       | n25                 | <b>0.1125</b>       | n45                 | <b>0.0605</b>       | p6                  | 0.204               |
| n9                  | <b>0.0885</b>       | n29                 | 0.183               | n46                 | 0.2095              | p7                  | 0.234               |
| n10                 | 0.2135              | n30                 | 0.1505              | n47                 | <b>0.0295</b>       | p8                  | 0.534               |
| n11                 | 0.2365              | n31                 | 0.1375              | n48                 | <b>0.0375</b>       | p11                 | 0.247               |
| n12                 | 0.2195              | n33                 | 0.2475              | n49                 | <b>0.1205</b>       | p15                 | 0.218               |
| n13                 | 0.1335              | n34                 | 0.1355              | n51                 | <b>0.0535</b>       | p16                 | 1.132               |
| n14                 | 0.2035              | n35                 | 0.2265              | n52                 | 0.1695              | p17                 | 0.209               |
| n15                 | <b>0.0795</b>       | n36                 | 0.1435              | n53                 | <b>0.1135</b>       | p18                 | 0.101               |
| n16                 | 0.1765              | n37                 | <b>0.0285</b>       | n54                 | 0.2525              | p19                 | 0.332               |
| p20                 | 0.327               | p38                 | 0.232               | p55                 | 0.207               | p76                 | 0.098               |
| p21                 | 0.347               | p39                 | 0.559               | p56                 | 0.242               | p77                 | 0.283               |
| p22                 | 0.558               | p40                 | 0.553               | p58                 | 0.211               | p80                 | 0.201               |
| p23                 | 0.236               | p41                 | 0.12                | p59                 | 0.142               | p81                 | 0.35                |
| p24                 | 0.278               | p42                 | 0.236               | p60                 | 0.367               | p82                 | 0.355               |
| p25                 | 0.706               | p43                 | 0.663               | p61                 | 0.287               | p83                 | 0.187               |
| p26                 | 1.314               | p44                 | 0.844               | p62                 | 0.335               | p84                 | 0.301               |
| p28                 | 0.268               | p45                 | 2.025               | p63                 | 0.23                | p85                 | 1.162               |
| p29                 | 0.364               | p46                 | 0.327               | p64                 | 0.967               | p86                 | 0.628               |
| p30                 | 0.258               | p47                 | 0.195               | p65                 | 0.184               | p87                 | 0.263               |
| p31                 | 0.231               | p48                 | 0.697               | p68                 | 0.22                | p88                 | 0.55                |
| p32                 | 0.638               | p49                 | 0.885               | p69                 | 0.38                | p89                 | 0.63                |
| p33                 | 1.443               | p50                 | 0.426               | p72                 | 0.298               | p91                 | 0.377               |
| p35                 | 0.129               | p51                 | 0.556               | p73                 | 0.382               | p92                 | 0.259               |
| p36                 | 0.39                | p52                 | 0.19                | p74                 | 0.154               | p93                 | 0.301               |
| p37                 | 0.504               | p53                 | 1.314               | p75                 | 0.127               | p94                 | 0.162               |

Sera name started by letter *n* indicate negative sera for visceral leishmaniasis (VL) and started by *p*, indicate positive sera for VL. Values bold highlighted were used for *cut off* determination. Blank average: 0.1065. Source: author.



TABLE IV  
Absorbance average of visceral leishmaniasis negative against recombinant protein Lc36 after 60 min of reaction. Sera dilution of 1:200

| Sera identification | Absorbance (405 nm) | Sera identification | Absorbance (405 nm) | Sera identification | Absorbance (405 nm) | Sera identification | Absorbance (405 nm) |
|---------------------|---------------------|---------------------|---------------------|---------------------|---------------------|---------------------|---------------------|
| n1b                 | <b>0,0975</b>       | n16b                | 0,1495              | n31b                | <b>0,0395</b>       | n46b                | 0,1385              |
| n2b                 | 0,1505              | n17b                | <b>0,0515</b>       | n32b                | 0,1005              | n47b                | 0,2015              |
| n3b                 | 0,1965              | n18b                | <b>0,0305</b>       | n33b                | <b>0,0555</b>       | n48b                | <b>0,0475</b>       |
| n4b                 | 0,2055              | n19b                | <b>0,0495</b>       | n34b                | 0,1295              | n49b                | <b>0,0205</b>       |
| n5b                 | 0,1575              | n20b                | 0,1095              | n35b                | <b>0,0415</b>       | n50b                | 0,1415              |
| n6b                 | 0,2035              | n21b                | <b>0,0585</b>       | n36b                | 0,1975              | -                   | -                   |
| n7b                 | <b>0,0745</b>       | n22b                | 0,1035              | n37b                | <b>0,0455</b>       | -                   | -                   |
| n8b                 | 0,0535              | n23b                | 0,1915              | n38b                | 0,2005              | -                   | -                   |
| n9b                 | 0,2115              | n24b                | 0,1525              | n39b                | <b>0,0235</b>       | -                   | -                   |
| n10b                | 0,2085              | n25b                | 0,1275              | n40b                | <b>0,0325</b>       | -                   | -                   |
| n11b                | 0,1985              | n26b                | 0,1445              | n41b                | 0,1125              | -                   | -                   |
| n12b                | <b>0,0405</b>       | n27b                | <b>0,0425</b>       | n42b                | <b>0,0615</b>       | -                   | -                   |
| n13b                | 0,1945              | n28b                | 0,1255              | n43b                | 0,1595              | -                   | -                   |
| n14b                | <b>0,0905</b>       | n29b                | 0,1445              | n44b                | 0,1045              | -                   | -                   |
| n15b                | 0,1985              | n30b                | <b>0,0305</b>       | n45b                | 0,1925              | -                   | -                   |

Letter b (n1b) indicates sera are different to assay sensibility and specificity sera (Table III). Values bold highlighted were used for *cut off* determination. Blank average: 0.1005. Source: Author.

TABLE V  
 Characteristics of 39 dogs with positive diagnosis for visceral leishmaniasis

| Sera identification | Absorbance 405 nm* | Clinical signs | RIFI      |     | Parasitological |          |           |          | PCR ( <i>Leishmania</i> spp.) |           |          |          | PCR ( <i>L. chagasi</i> ) |          |
|---------------------|--------------------|----------------|-----------|-----|-----------------|----------|-----------|----------|-------------------------------|-----------|----------|----------|---------------------------|----------|
|                     |                    |                | Screening | Tit | Blood           | MO**     | Lymphnode | Blood    | MO**                          | Linfonodo | Blood    | MO**     | Linfonodo                 |          |
|                     |                    |                |           |     |                 |          |           |          |                               |           |          |          |                           |          |
| p42b                | 1,399              | Present        | Positive  | 40  | Positive        | Positive | Negative  | Positive | Positive                      | Positive  | Positive | Negative | Positive                  | Positive |
| p43b                | 0,321              | Present        | Positive  | 640 | Positive        | Positive | Positive  | Positive | Positive                      | Positive  | Positive | Negative | Positive                  | Positive |
| p44b                | 0,354              | Present        | Positive  | 640 | Negative        | Negative | Negative  | Negative | Positive                      | Positive  | Positive | Negative | Positive                  | Negative |
| p45b                | 0,323              | Present        | Positive  | 320 | Positive        | Positive | Positive  | Positive | Negative                      | Positive  | Positive | Negative | Negative                  | Positive |
| p46b                | 0,459              | Present        | Positive  | 640 | Negative        | Negative | Negative  | Negative | Positive                      | Positive  | Positive | Positive | Positive                  | Positive |
| p47b                | 0,394              | Present        | Positive  | 160 | Negative        | Negative | Positive  | Positive | Positive                      | Positive  | Positive | Negative | Positive                  | Negative |
| p48b                | 0,427              | Present        | Positive  | 160 | Negative        | Negative | Positive  | Positive | Positive                      | Positive  | Positive | Positive | Positive                  | Positive |
| p49b                | 0,366              | Present        | Positive  | 640 | Negative        | Negative | Positive  | Positive | Positive                      | Positive  | Positive | Positive | Positive                  | Positive |
| p50b                | 1,045              | Absent         | Positive  | 320 | Negative        | Negative | Positive  | Positive | Positive                      | Positive  | Positive | Positive | Positive                  | Negative |
| p51b                | 0,292              | Present        | Positive  | 640 | Negative        | Negative | Negative  | Negative | Positive                      | Positive  | Positive | Negative | Positive                  | Negative |
| p52b                | 0,325              | Present        | Positive  | 640 | Negative        | Negative | Negative  | Negative | Positive                      | Positive  | Positive | Negative | Positive                  | Positive |
| p53b                | 0,491              | Present        | Positive  | 640 | Negative        | Negative | Negative  | Negative | Positive                      | Positive  | Positive | Negative | Positive                  | Positive |
| p54b                | 0,387              | Present        | Positive  | 640 | Negative        | Negative | Negative  | Negative | Positive                      | Positive  | Positive | Negative | Positive                  | Positive |
| p55b                | 0,488              | Present        | Positive  | 640 | Negative        | Negative | Negative  | Negative | Positive                      | Positive  | Positive | Negative | Positive                  | Positive |
| p56b                | 0,265              | Present        | Positive  | 640 | Negative        | Negative | Positive  | Positive | Positive                      | Positive  | Positive | Positive | Positive                  | Positive |
| p57b                | 0,39               | Present        | Positive  | 640 | Negative        | Negative | Negative  | Negative | Positive                      | Positive  | Positive | Positive | Positive                  | Positive |
| p58b                | 0,311              | Present        | Positive  | 320 | Negative        | Negative | Negative  | Negative | Positive                      | Positive  | Positive | Positive | Positive                  | Positive |
| p59b                | 0,46               | Present        | Positive  | 640 | Negative        | Negative | Negative  | Negative | Positive                      | Positive  | Positive | Positive | Positive                  | Positive |
| p60b                | 0,471              | Present        | Positive  | 320 | Negative        | Negative | Negative  | Negative | Positive                      | Positive  | Positive | Negative | Positive                  | Positive |
| p61b                | 0,292              | Present        | Positive  | 640 | Negative        | Negative | Negative  | Positive | Positive                      | Positive  | Positive | Positive | Positive                  | Positive |
| p62b                | 0,407              | Present        | Positive  | 640 | Negative        | Negative | Negative  | Negative | Positive                      | Positive  | Positive | Negative | Positive                  | Positive |
| p63b                | 1,268              | Present        | Positive  | 160 | Negative        | Negative | Negative  | Negative | Positive                      | Positive  | Positive | Positive | Positive                  | Positive |
| p64b                | 0,734              | Absent         | Positive  | 640 | Negative        | Negative | Negative  | Negative | Positive                      | Positive  | Positive | Negative | Positive                  | Positive |
| p65b                | 0,393              | Present        | Positive  | 640 | Negative        | Negative | Positive  | Positive | Positive                      | Positive  | Positive | Positive | Positive                  | Positive |
| p66b                | 0,654              | Present        | Positive  | 320 | Negative        | Negative | Negative  | Negative | Positive                      | Positive  | Positive | Negative | Positive                  | Positive |
| p67b                | 0,792              | Present        | Positive  | 160 | Negative        | Negative | Negative  | Negative | Positive                      | Positive  | Positive | Negative | Positive                  | Negative |
| p68b                | 0,478              | Present        | Positive  | 320 | Negative        | Negative | Negative  | Negative | Positive                      | Positive  | Positive | Negative | Positive                  | Positive |
| p69b                | 0,383              | Absent         | Positive  | 80  | Negative        | Negative | Positive  | Positive | Positive                      | Positive  | Positive | Negative | Positive                  | Positive |
| p70b                | 0,413              | Absent         | Positive  | 80  | Positive        | Positive | Negative  | Negative | Positive                      | Positive  | Positive | Positive | Negative                  | Negative |
| p71b                | 0,263              | Absent         | Positive  | 640 | Negative        | Negative | Positive  | Positive | Positive                      | Positive  | Positive | Positive | Positive                  | Positive |
| p72b                | 0,243              | Present        | Positive  | 80  | Negative        | Negative | Negative  | Negative | Positive                      | Positive  | Positive | Negative | Positive                  | Negative |
| p73b                | 0,199              | Present        | Positive  | 640 | Negative        | Negative | Negative  | Negative | Positive                      | Positive  | Positive | Negative | Positive                  | Positive |
| p74b                | 0,193              | Present        | Positive  | 320 | Positive        | Positive | Negative  | Negative | Positive                      | Positive  | Positive | Positive | Positive                  | Negative |

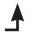

| Sera identification | Absorbance 405 nm* | Clinical signs | RIFI     |     |          | Parasitological |           |          | PCR ( <i>L. chagasi</i> ) |           |          | PCR ( <i>L. chagasi</i> ) |           |          |          |
|---------------------|--------------------|----------------|----------|-----|----------|-----------------|-----------|----------|---------------------------|-----------|----------|---------------------------|-----------|----------|----------|
|                     |                    |                | Screenig | Tit | Blood    | MO**            | Lymphnode | Blood    | MO**                      | Linfonodo | Blood    | MO**                      | Linfonodo | Blood    | MO**     |
| p75b                | 0,174              | Present        | Positive | 640 | Negative | Negative        | Negative  | Positive | Positive                  | Positive  | Negative | Negative                  | Positive  | Positive | Positive |
| p76b                | 0,172              | Present        | Positive | 640 | Negative | Negative        | Negative  | Positive | Positive                  | Positive  | Negative | Negative                  | Positive  | Positive | Positive |
| p77b                | 0,16               | Present        | Positive | 640 | Positive | Negative        | Positive  | Positive | Positive                  | Positive  | Negative | Negative                  | Positive  | Positive | Negative |
| p78b                | 0,148              | Absent         | Positive | 40  | Negative | Negative        | Negative  | Positive | Positive                  | Positive  | Negative | Negative                  | Positive  | Positive | Negative |
| p79b                | 0,137              | Present        | Positive | 640 | Negative | Negative        | Negative  | Positive | Positive                  | Positive  | Negative | Negative                  | Negative  | Positive | Negative |
| p80b                | 0,134              | Present        | Positive | 640 | Negative | Negative        | Negative  | Positive | Positive                  | Positive  | Negative | Negative                  | Positive  | Positive | Positive |

\*: absorbance values with the mean of the subtracted blank; \*\*: MO = macrophages. Sera marked in gray highlight the asymptomatic animals. Letter b (plb) indicates sera are different to assay sensibility and specificity sera (Table III). Blank average: 0.1005. Source: FMVZ - UNESP and Author.
